# Supplementary material for: Treatment strategy for papillary renal cell carcinoma type 2: a case series of seven patients treated based on next generation sequencing data
Source: PubMed Central journal article supplement — Ann Transl Med. 2020 Nov;8(21):1389. doi: 10.21037/atm-20-3466 (PMC7723617; doi:10.21037/atm-20-3466), 2020-11

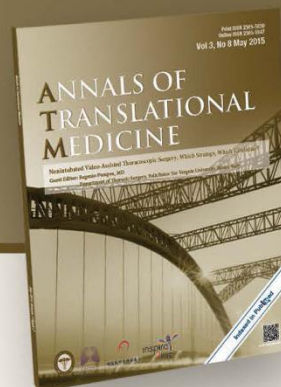

Peer Review File

Article information: <http://dx.doi.org/10.21037/atm-20-3466>

## Reviewer:

1. This study belongs to case series in clinical research design. So I suggest the authors to indicate this clearly in their title.

**: I agree with your comment. I rewrite title of our manuscript as your comment as below.**

**[Treatment Strategy for Papillary Renal Cell Carcinoma Type 2: a case series of seven patients treated based on next generation sequencing data]**

**Page 1 line 1,2 : *Treatment Strategy for Papillary Renal Cell Carcinoma Type 2: a case series of seven patients treated based on next generation sequencing data***

2. The section, patients and methods, should follow introduction section. Please re-organize accordingly.

**: Thanks for your comment. I re-organized our manuscript according your comment.**

**Page 5 line 17- Page 7 line 19 : Patients and Methods section**

3. Introduction seems inadequate. What has been known and has been unknown on precision oncology treatment of PRCC2, and the authors' comments on current progress should be presented in detail.

**: Your comment is helpful to improve our manuscript. However, there have been no clinical trials or explorative treatments for PRCC2 based on genetic information due to rarity of PRCC2. In addition, current treatment guideline could not reflect the advance of comprehensive genomic analysis in PRCC2. Treatment guideline recommended only bevacizumab plus erlotinib treatment for HLRCC among PRCC2.**

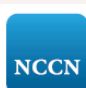

National  
Comprehensive  
Cancer  
Network®

## NCCN Guidelines Version 2.2020 Kidney Cancer

[NCCN Guidelines Index](#)  
[Table of Contents](#)  
[Discussion](#)

### PRINCIPLES OF SYSTEMIC THERAPY FOR RELAPSE OR STAGE IV DISEASE

| SYSTEMIC THERAPY FOR NON-CLEAR CELL HISTOLOGY <sup>f</sup>                              |                                                                                        |                                                                                                                                                                                                                                                                                                                                                                                                                                                                                                                                                                                  |
|-----------------------------------------------------------------------------------------|----------------------------------------------------------------------------------------|----------------------------------------------------------------------------------------------------------------------------------------------------------------------------------------------------------------------------------------------------------------------------------------------------------------------------------------------------------------------------------------------------------------------------------------------------------------------------------------------------------------------------------------------------------------------------------|
| Preferred regimens                                                                      | Other recommended regimens                                                             | Useful under certain circumstances                                                                                                                                                                                                                                                                                                                                                                                                                                                                                                                                               |
| <ul style="list-style-type: none"> <li>• Clinical trial</li> <li>• Sunitinib</li> </ul> | <ul style="list-style-type: none"> <li>• Cabozantinib</li> <li>• Everolimus</li> </ul> | <ul style="list-style-type: none"> <li>• Axitinib</li> <li>• Bevacizumab or biosimilar<sup>e</sup></li> <li>• Erlotinib</li> <li>• Lenvatinib + everolimus</li> <li>• Nivolumab</li> <li>• Pazopanib</li> <li>• Bevacizumab or biosimilar<sup>e</sup> + erlotinib for selected patients with advanced papillary RCC including hereditary leiomyomatosis and renal cell cancer (HLRCC)</li> <li>• Bevacizumab or biosimilar<sup>e</sup> + everolimus</li> <li>• Temsirolimus<sup>d</sup> (category 1 for poor-prognosis risk group; category 2A for other risk groups)</li> </ul> |

Therefore, there are no reports of precision treatment of PRCC2 to introduce in our manuscript.

**Page 5 line 2-7: However, current treatment guideline could not reflect the advance of comprehensive genomic analysis in PRCC2. Current treatment guideline suggested sunitinib or clinical trial as the first line treatment for metastatic non-clear renal cell carcinoma, including PRCC2. Treatment guideline recommended only bevacizumab plus erlotinib treatment for HLRCC among PRCC2. Moreover, there have been no clinical trials of treatment based on genomic information of PRCC2 because of disease rarity.**

4. I agree with the importance of precision treatment, but relying on genetic heterogeneity to provide treatment might be insufficient because clinical heterogeneity must also be considered.

**: We definitely agree with your opinion. Clinical heterogeneities of tumor characteristics including metastatic site and number of metastatic site and risk models which consisted of interval from diagnosis to treatment, performance status and laboratory tests should be**



considered for treatment of patient with metastatic renal cell carcinoma.

In metastatic renal cell carcinoma, two risk models have been frequently used to direct treatment: (1) Memorial Sloan Kettering Cancer Center (MSKCC) Prognostic Model and (2) International Metastatic Renal Cell Carcinoma Database Consortium (IMDC) Criteria.

National  
Comprehensive  
Cancer  
Network®

**NCCN Guidelines Version 2.2020**  
**Kidney Cancer**

[NCCN Guidelines Index](#)

[Table of Contents](#)

[Discussion](#)

**RISK MODELS TO DIRECT TREATMENT**

**Memorial Sloan Kettering Cancer Center (MSKCC) Prognostic Model<sup>a</sup>**

**Prognostic factors**

- Interval from diagnosis to treatment of less than 1 year
- Karnofsky performance status less than 80%
- Serum lactate dehydrogenase (LDH) greater than 1.5 times the upper limit of normal (ULN)
- Corrected serum calcium greater than the ULN
- Serum hemoglobin less than the lower limit of normal (LLN)

**Prognostic risk groups**

- Low-risk group: no prognostic factors
- Intermediate-risk group: one or two prognostic factors
- Poor-risk group: three or more prognostic factors

**International Metastatic Renal Cell Carcinoma Database Consortium (IMDC) Criteria<sup>b</sup>**

**Prognostic factors**

1. Less than one year from time of diagnosis to systemic therapy
2. Performance status <80% (Karnofsky)
3. Hemoglobin < lower limit of normal (Normal: 120 g/L or 12 g/dL)
4. Calcium > upper limit of normal (Normal: 8.5–10.2 mg/dL)
5. Neutrophil > upper limit of normal (Normal:  $2.0\text{--}7.0 \times 10^9/\text{L}$ )
6. Platelets > upper limit of normal (Normal: 150,000–400,000)

**Prognostic risk groups**

- Favorable-risk group: no prognostic factors
- Intermediate-risk group: one or two prognostic factors
- Poor-risk group: three to six prognostic factors

Therefore, we added the information of prognostic risk group of patients with metastatic PRCC2. In addition, we revised our manuscript as your comment in discussion section.

**Page 8 lines 5-6: Two patients had poor prognostic risk groups and one of intermediate risk group according to Memorial Sloan Kettering Cancer Center Prognostic Model [28].**

**Page 14 line 18- page 15 line 2: Moreover, in terms of prognostic risk group according to clinical characteristics, this patient was categorized into intermediate risk group, not poor risk group in which other two patients with metastatic PRCC2 harboring FH mutation [27]. Therefore, we treated PRCC2 as clear cell RCC with axitinib and he might be have favorable**



*treatment outcome in this case.*

*The relationship between genetic alteration and clinical characteristics including risk groups have not been revealed neither previous studies nor our study. Further large scaled genetic studies of metastatic PRCC2 would give the information of the relationship between genetic and clinical characteristics to guide treatment of metastatic PRCC2.*

## Page 22 lines 1-4 Table1. Clinical information of papillary renal cell carcinoma type 2

### A. Clinical and pathological baseline characteristics

|   | Age<br>(YO) <sup>1</sup> | Sex | Prognostic<br>risk group | Stage | Grade | FU (Mo) <sup>2</sup> | Status           | Tumor               | Normal          | Sampletype        |
|---|--------------------------|-----|--------------------------|-------|-------|----------------------|------------------|---------------------|-----------------|-------------------|
| 1 | 30                       | M   | NA                       | 3     | 4     | 95.20                | NED <sup>3</sup> | Kidney <sup>6</sup> | Kidney          | Freshfrozen       |
| 2 | 74                       | M   | NA                       | 1     | 3     | 46.83                | NED              | Kidney <sup>6</sup> | Kidney          | Freshfrozen       |
| 3 | 82                       | M   | Intermediate             | 4     | 3     | 69.40                | Dead             | Kidney <sup>6</sup> | Kidney          | Freshfrozen       |
| 4 | 63                       | M   | NA                       | 1     | 3     | 81.17                | NED              | Kidney <sup>6</sup> | Kidney          | Freshfrozen       |
| 5 | 51                       | M   | NA                       | 1     | 3     | 108.60               | NED              | Kidney <sup>6</sup> | PB <sup>4</sup> | Freshfrozen       |
| 6 | 27                       | M   | High                     | 4     | NA    | 14.50                | Dead.            | Bone <sup>7</sup>   | PB              | FFPE <sup>5</sup> |
| 7 | 26                       | F   | High                     | 4     | 3     | 35.83                | Dead             | Kidney <sup>7</sup> | PB              | FFPE              |

<sup>1</sup>Year-old; <sup>2</sup>Months; <sup>3</sup>No evidence of disease; <sup>4</sup>Peripheral blood; <sup>5</sup>Formalin fixed paraffin embedded; <sup>6</sup>Surgical specimen; <sup>7</sup>Percutaneous needle biopsy specimen

5. Treatment outcomes such as survival and time to progression should be provided in detail.

: We described treatment outcome and time to progression in table 1B. As your comment, we added more information of treatment outcome and overall survival in result section



and table 1B.

Page 9 line 23- page 10 line 5: *After we found the FH germline mutation, the patient was treated with a combination of bevacizumab (an anti-VEGF antibody) and erlotinib (an epithelial growth factor receptor [EGFR] TKI) and showed a durable response of 40 weeks (Figure 4A). Disease progression after bevacizumab and erlotinib treatment, there was no effective treatment strategy. In this patient, overall survival (OS) duration between diagnosis to death was 14.5months.*

Page 10 lines 9-12: *Time to progression of pazopanib treatment was 52weeks. Her disease also harbored PMS2 alteration (Figure 4B). However, her performance status did not permit further treatment, such as immune check point inhibitor. She had 35.8 months of overall survival.*

Page 10 lines 16-17: *He responded axitinib treatment for a long duration (87weeks) until adverse events forbade him from receiving treatment (Table 1B) (Figure 4C).*

Page 22 lines 5-7 Table1. Clinical information of papillary renal cell carcinoma type 2

## B. Medical treatment of stage IV PRCC2 patients.

| . | Metastasis Sites | Treatment    | No.of cycle | Time to progression (weeks) | Best Response   | Treatment off | Overall survival duration |
|---|------------------|--------------|-------------|-----------------------------|-----------------|---------------|---------------------------|
| 3 | Lung             | Temsirolimus | Week 12     | 23                          | SD <sup>1</sup> | Adverse event | 69.4months                |
|   | Adrenal          | Axitinib     | 22          | 87                          | PR <sup>2</sup> | Patient       |                           |



| gland |              |                   |         | wish |                 |                 |
|-------|--------------|-------------------|---------|------|-----------------|-----------------|
| 6     | Bone, liver, | Temsirolimus      | Week 4  | 4    | PD <sup>3</sup> | PD <sup>3</sup> |
|       | Lymph node   | Axitinib          | 1       | 4    | PD <sup>3</sup> | PD <sup>3</sup> |
|       |              | Gemcitabine       | 1       | 4    | PD <sup>3</sup> | PD <sup>3</sup> |
|       |              | plus cisplatin    |         |      |                 |                 |
|       |              | Pembrolizumab     | 2       | 2    | PD <sup>3</sup> | PD <sup>3</sup> |
|       |              | Bevacizumab +     | 13      | 40   | SD <sup>1</sup> | PD <sup>3</sup> |
|       |              | erlotinib‡        |         |      |                 |                 |
|       |              | Nivolumab+ipili   | 1       | 2    | PD <sup>3</sup> | PD <sup>3</sup> |
|       |              | mumab             |         |      |                 |                 |
| 7     | Bone         | RTx1*             |         |      |                 | PD <sup>3</sup> |
|       | Liver        | Temsirolimus      | Week 26 | 26   | SD <sup>1</sup> | PD <sup>3</sup> |
|       | Adrenal      | High dose         | 6       | 19   | SD <sup>1</sup> | PD <sup>3</sup> |
|       | gland        | interleukin-2     |         |      |                 |                 |
|       | Peritoneum   | RTx2 <sup>†</sup> |         |      |                 | PD <sup>3</sup> |
|       |              | Pazopanib‡        | 14      | 52   | PR <sup>2</sup> | PD <sup>3</sup> |

\*Tomotherapy at bone metastasis; <sup>†</sup>Tomotherapy at bone, adrenal gland, abdomen wall, pelvis metastasis; ‡Precision treatment using NGS data; <sup>1</sup>Stable disease; <sup>2</sup>Partial response; <sup>3</sup>Progressive disease

# ANNALS OF TRANSLATIONAL MEDICINE

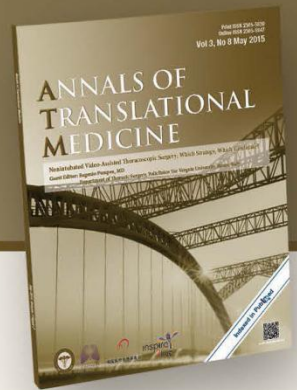

Supplement: atm-08-21-1389-prf.pdf [file atm-08-21-1389-prf.pdf]
