# Supplementary material for: Treatment strategy for papillary renal cell carcinoma type 2: a case series of seven patients treated based on next generation sequencing data
Source: PubMed Central journal article supplement — Ann Transl Med. 2020 Nov;8(21):1389. doi: 10.21037/atm-20-3466 (PMC7723617; doi:10.21037/atm-20-3466), 2020-11
Supplement: atm-08-21-1389-dss.pdf [file atm-08-21-1389-dss.pdf]

## Data Sharing Statement

|                     |                                                                                                                                                    |                                                                                                                                                                                                           |
|---------------------|----------------------------------------------------------------------------------------------------------------------------------------------------|-----------------------------------------------------------------------------------------------------------------------------------------------------------------------------------------------------------|
| <b>Article Info</b> | http://dx.doi.org/10.21037/atm-20-3466                                                                                                             |                                                                                                                                                                                                           |
| <b>Item</b>         | <b>Question</b>                                                                                                                                    | <b>Authors' Response<br/>(place "-" if not applicable)</b>                                                                                                                                                |
| 1                   | Would you like to share data collected for your study to others?                                                                                   | yes                                                                                                                                                                                                       |
| 2                   | If not, would you like to share the reason for your decision?                                                                                      | -                                                                                                                                                                                                         |
| 3                   | What data in particular will be shared?                                                                                                            | Whole exome sequencing fastq data will be shared in particular, and genomic sequencing can help genetically identify targeted therapy candidates for PRCC2. This was rarely provided in previous studies. |
| 4                   | Any other documents will be share? Such as study protocol, statistical analysis plan, informed consent form, clinical study report, analytic code. | -                                                                                                                                                                                                         |
| 5                   | When will data availability begin?                                                                                                                 | From the publication date.                                                                                                                                                                                |
| 6                   | When will data availability end?                                                                                                                   | -                                                                                                                                                                                                         |
| 7                   | To whom will you share the data?                                                                                                                   | Medical oncologist and bioinformatics interested in PRCC2 research.                                                                                                                                       |
| 8                   | For what type of analysis or purpose?                                                                                                              | Analysis to identify candidates for targeted therapy using genomic information from PRCC2 patients.                                                                                                       |
| 9                   | How or where can the data/documents be obtained?                                                                                                   | Emails could be sent to the address below to obtain the shared data:<br>seminlee@unist.ac.kr                                                                                                              |
| 10                  | Any other restrictions?                                                                                                                            | We may balance the potential benefits and risks for each request and then provide the data that could be shared.                                                                                          |
