# Supplementary figures and images for: Treatment strategy for papillary renal cell carcinoma type 2: a case series of seven patients treated based on next generation sequencing data
Source: PubMed Central journal article supplement — Ann Transl Med. 2020 Nov;8(21):1389. doi: 10.21037/atm-20-3466 (PMC7723617; doi:10.21037/atm-20-3466), 2020-11

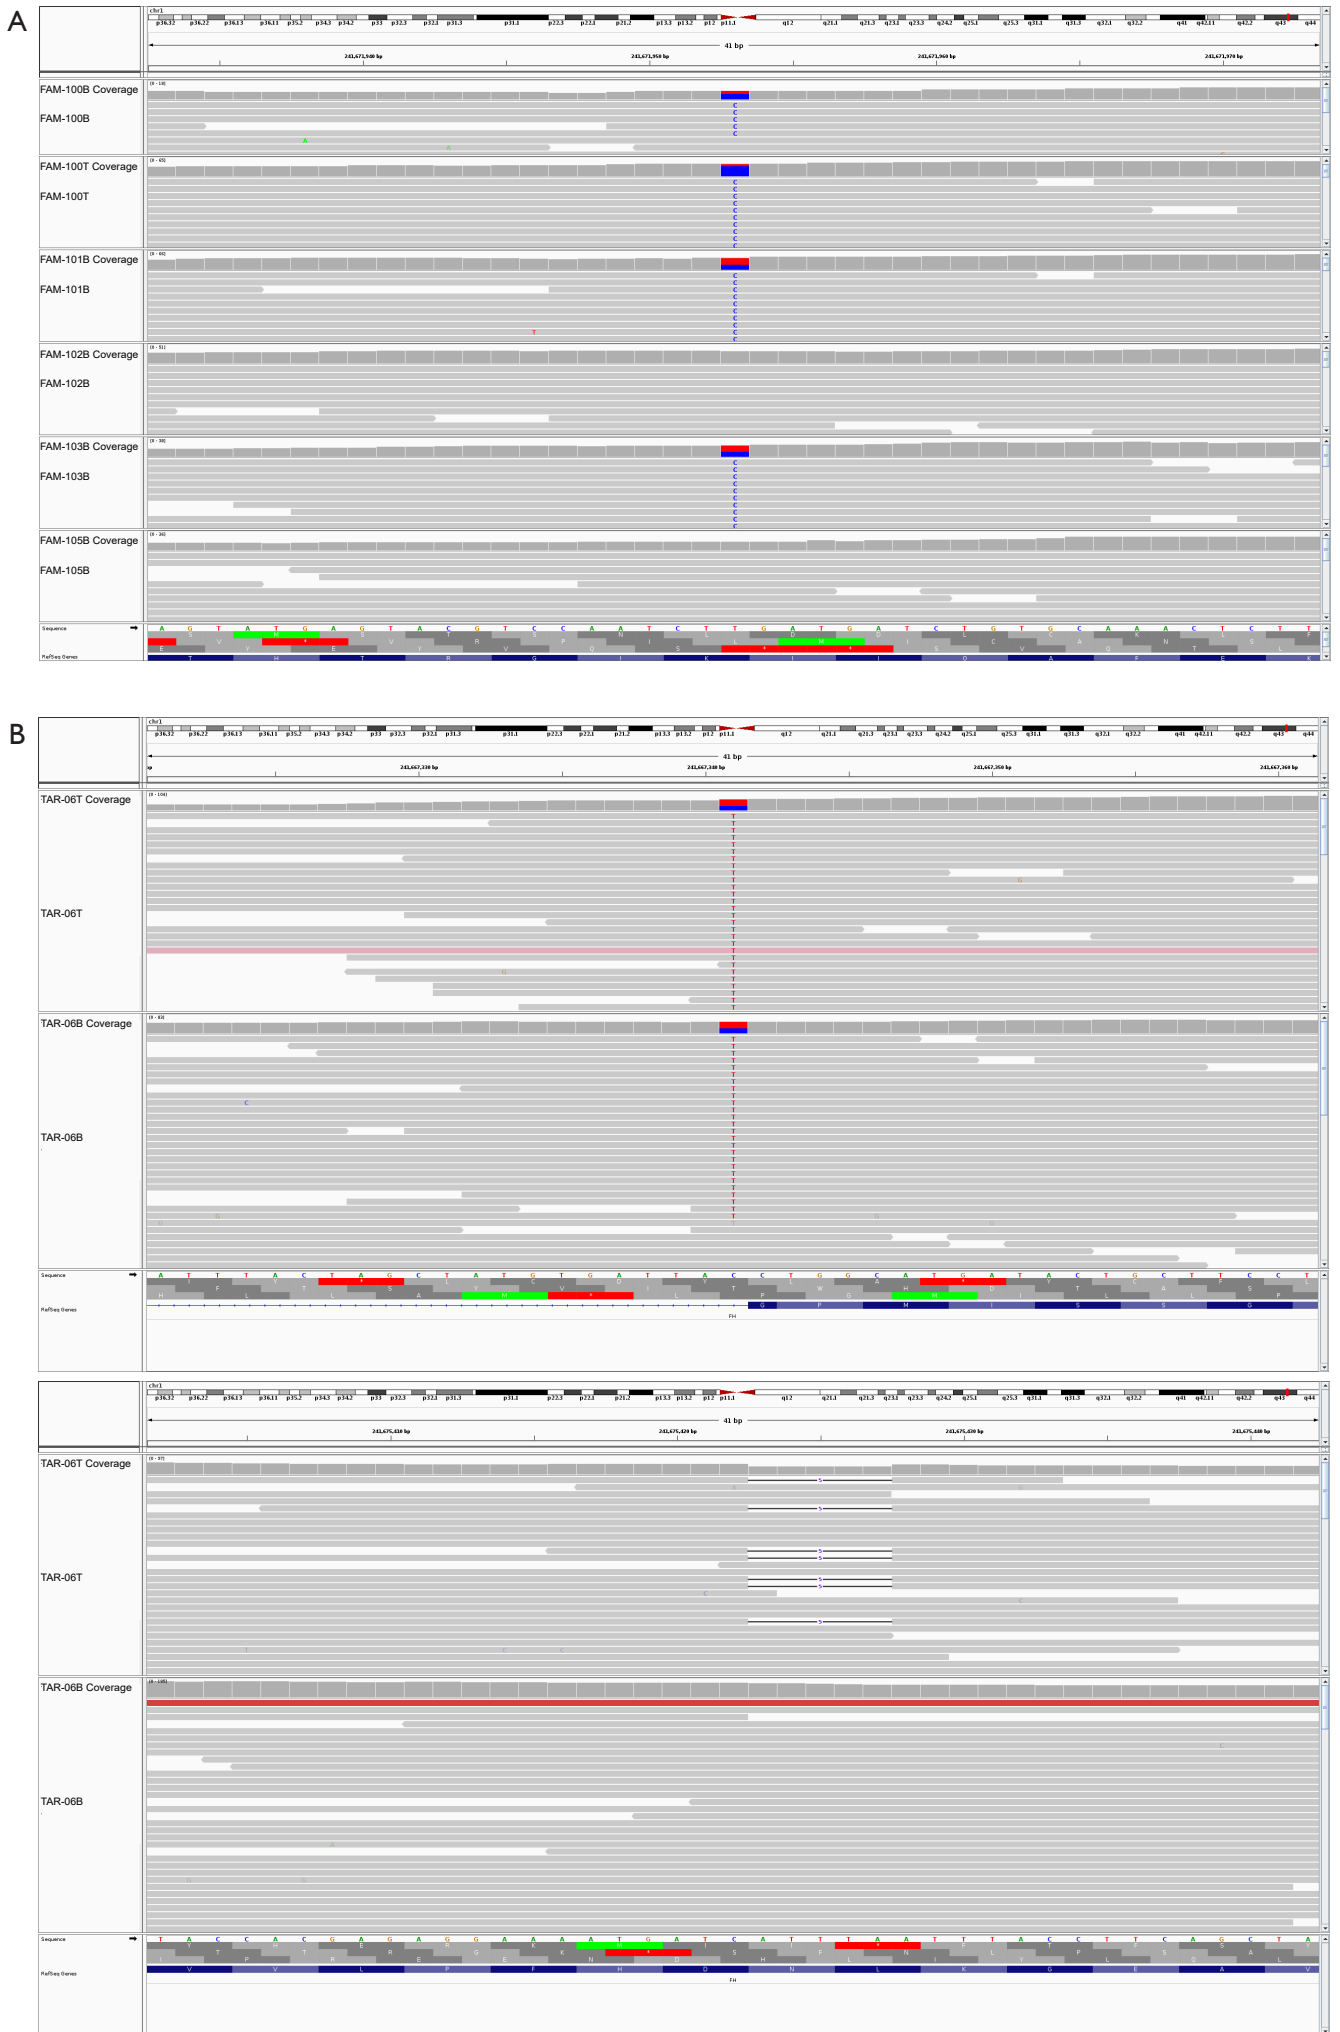

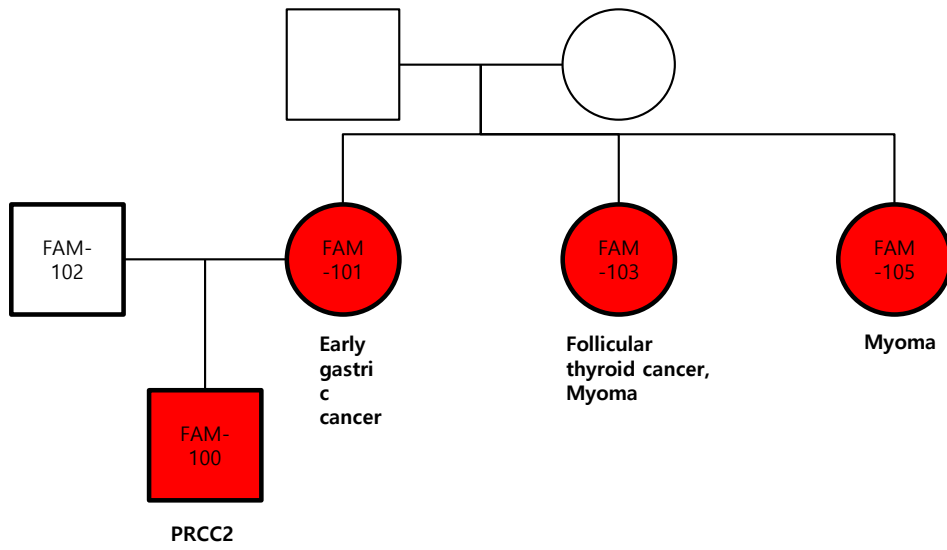

**Figure S2** Pedigree of family with HLRCC.

Supplement: atm-08-21-1389-supplementary.pdf [file atm-08-21-1389-supplementary.pdf]
